# 1 Multiple sources of signaling noise in bacterial chemotaxis network

2 R. Colin<sup>1,\*,+</sup>, C. Rosazza<sup>1,\*</sup>, A. Vaknin<sup>2</sup>, V. Sourjik<sup>1,+</sup>

3 <sup>1</sup>Max Planck Institute for Terrestrial Microbiology and LOEWE Center for Synthetic  
4 Microbiology (SYNMIKRO), Karl-von-Frisch-Strasse 16, D-35043 Marburg, Germany

5 <sup>2</sup>The Racah Institute of Physics, the Hebrew University, Jerusalem 91904, Israel

6 \* Authors contributed equally to this work.

7 <sup>+</sup> Corresponding authors: [victor.sourjik@synmikro.mpi-marburg.mpg.de](mailto:victor.sourjik@synmikro.mpi-marburg.mpg.de),

8 [remy.colin@synmikro.mpi-marburg.mpg.de](mailto:remy.colin@synmikro.mpi-marburg.mpg.de)

9

## 10 Abstract

11 Due to their relatively small size and a limited number of components, cells are intrinsically  
12 subject to stochastic fluctuations. Whereas stochasticity in gene expression has been extensively  
13 investigated, much less is known about posttranslational noise arising from activity fluctuations  
14 within protein networks. The pathway controlling chemotaxis of *Escherichia coli* provides one  
15 of the few examples where signaling noise has been previously deduced from cellular behavior.  
16 Here we use direct single-cell FRET measurements of the pathway activity to directly confirm  
17 the existence of signaling noise in chemotaxis and to characterize its determinants. Our analysis  
18 confirms previously proposed role of chemoreceptor methylation enzymes as major contributors  
19 to the pathway noise. However, it also demonstrates that allosteric interactions and slow receptor  
20 rearrangements within clusters of chemoreceptors contribute largely to activity fluctuations.  
21 Resulting mathematical description of activity fluctuations illustrates the inherent relation  
22 between the noise in the signaling system and its sensitivity to perturbations.

23

## 24 **Introduction**

25

26 It is well established that cellular processes are prone to fluctuations due to their intrinsic  
27 stochasticity combined with a small number of reactant molecules [1-3]. Best-characterized  
28 examples of such cellular noise relate to the variability in expression of genes or proteins,  
29 observed either across a population of genetically identical cells or within one cell over time [4,  
30 5]. Such stochastic variability may be further enhanced by feedbacks present in gene regulatory  
31 networks, in extreme cases causing genetically identical cells to exhibit distinctly different  
32 behaviors [6-8]. In most cases the effects of noise are detrimental, limiting the ability of cellular  
33 networks to precisely perform such functions as information processing [1, 9-12]. Therefore,  
34 cellular networks are believed to have evolved features that enable them to function robustly in  
35 presence of stochastic fluctuations in the levels of their components [13-16].

36 In contrast to gene expression noise, much less is known about the origins, extent or effects of  
37 noise that can arise at the posttranslational level, although such noise is expected to be  
38 ubiquitous. Chemotaxis of *Escherichia coli*, a bacterial model for signal transduction, previously  
39 provided one of the few examples where signaling noise within the network has been indeed  
40 deduced from studies of cell motility and flagellar rotation [17-23]. Subsequent theoretical  
41 analysis suggested that such behavioral fluctuations might provide physiological benefit, by  
42 enhancing environmental exploration [18, 24-28].

43 At the molecular level, these fluctuations were proposed to originate within the methylation-  
44 based adaptation system [17, 29, 30]. Adaptation in chemotaxis is mediated by two enzymes, the  
45 methyltransferase CheR and the methylesterase CheB, which respectively add or remove methyl  
46 groups at four specific glutamate residues of the chemoreceptors [31-35]. Notably, for the major

47 chemoreceptors of *E. coli*, Tar and Tsr, two of these residues are initially encoded as glutamines  
48 that are functionally similar to methylated glutamates and subsequently deamidated to  
49 glutamates by CheB [35, 36]. Changes in receptor methylation control the activity of the sensory  
50 complexes which further include the receptor-associated kinase CheA and the scaffold protein  
51 CheW, such that methylation compensates effects of chemotactic stimulation via negative  
52 feedback loops [37-40]. This adaptation enables cells to robustly maintain intermediate CheA  
53 activity and thus intermediate phosphorylation of the response regulator CheY. Phosphorylated  
54 CheY (CheY-P) controls the rotation of flagellar motor and cell swimming. The adapted level of  
55 CheY-P falls into the most sensitive part of the motor response [41], ensuring that bacteria  
56 remains chemotactic in a wide range of background stimulation.

57 Despite this importance of the adaptation system for robust maintenance of the average signaling  
58 output, the relatively small number of methylation enzymes [42] and their slow exchange rates at  
59 their receptor substrates [43, 44] may result in fluctuations of the level of phosphorylated CheY  
60 [17, 18, 20]. Further amplified by the cooperative response of flagellar motor [29, 41], these  
61 fluctuations were suggested to produce the observed large variation in the motor rotation [18, 23]  
62 and in the swimming behavior [17, 45] of individual cells over time.

63 Besides amplification at the motor level, signals in the chemotaxis pathway are also amplified by  
64 cooperative interactions in signaling arrays (clusters) of chemoreceptors [46, 47]. These  
65 interactions have been previously described using either the Monod-Wyman-Changeux (MWC)  
66 model which assumes that receptors operate in units (signaling teams) of 10-20 dimers where  
67 activities of individual receptors are tightly coupled [48-50] or using an Ising model of a receptor  
68 lattice with intermediate coupling [51]. But despite the established importance of these

69 cooperative interactions for signal processing, the contribution of receptor clustering to the  
70 pathway noise remained untested.

71 Here we directly monitored signaling noise in *E. coli* chemotaxis pathway using Förster  
72 (fluorescence) resonance energy transfer (FRET). Combining single-cell experiments with  
73 mathematical analysis, we show that pathway activity fluctuations arise from interplay of  
74 multiple factors. Besides the methylation system, these include previously observed slow  
75 rearrangements within receptor clusters [52] as well as the cooperative interactions between  
76 clustered chemoreceptors.

77

## 78 **Results**

79

### 80 **Pathway activity fluctuations in adapting cells**

81 To perform time-resolved characterization of the chemotaxis pathway activity in individual *E.*  
82 *coli* cells, we adapted the microscopy-based ratiometric FRET assay that was previously used at  
83 the population level [53] . This assay relies on the phosphorylation-dependent interaction  
84 between CheY, fused to yellow fluorescent protein (CheY-YFP), and its phosphatase CheZ,  
85 fused to cyan fluorescent protein (CheZ-CFP). Whereas previous measurements of this FRET  
86 reporter relied on the signal collection from an area containing several hundred cells using  
87 photon counters [54], here we used imaging with the electron multiplication charge-coupled  
88 device (EM-CCD) camera (see Material and Methods). When integrated over the population, the  
89 chemoattractant response of *E. coli* cells that express the FRET pair and a major chemoreceptor  
90 Tar (Figure 1A) was very similar to the one observed previously [53, 55]. Upon stimulation with  
91 the chemoattractant  $\alpha$ -methyl-aspartate (MeAsp) the ratio of the YFP to CFP fluorescence

92 decreased, consistent with the attractant-mediated inhibition of the kinase activity, and therefore  
93 of energy transfer from the donor (CFP) to the acceptor (YFP). Furthermore, the pathway  
94 subsequently adapted to the new background level of attractant via the CheR-dependent increase  
95 in receptor methylation, but as previously reported adaptation to high levels of MeAsp is only  
96 partial [55-57]. Subsequent removal of attractant resulted in a transient increase in kinase  
97 activity, followed by the CheB-mediated adaptation through the demethylation of receptors.  
98 Although the YFP/CFP ratio measured for individual cells during the same experiment was  
99 expectedly noisier than the population-averaged data, both the initial response and subsequent  
100 adaptation were clearly distinguishable (Figure 1B). In contrast to the population measurement,  
101 however, a majority of individual cells also exhibited large fluctuations in the YFP/CFP ratio  
102 (also Figure 1 – Figure Supplement 1), which were apparently different from the measurement  
103 noise that was observed in the negative control (receptorless cells with largely inactive pathway;  
104 Figure 1 – Figure Supplement 2). For cells adapted in buffer, these fluctuations could be as large  
105 as the response to attractant. Importantly, these long-term fluctuations were initially suppressed  
106 upon saturating inhibition of the pathway activity with 10  $\mu$ M MeAsp but then (partly) recovered  
107 upon (imperfect) adaptation, confirming their relation to the pathway activity.  
108 To analyze these fluctuations in greater detail, the power spectral density (PSD) of the single-cell  
109 YFP/CFP ratio,  $s_R(\omega)$ , was computed for buffer- or attractant-adapted cells, as well as for the  
110 receptorless cells that do not activate CheA. The PSD enables to extract the average spectral  
111 content of the temporal variations of the single-cell ratio, *i.e.* to determine frequencies at which  
112 this ratio fluctuates. To rule out possible effects of the initial state of receptor modification on the  
113 observed fluctuations, we analyzed cells that express Tar in either the native half-modified  
114 (Tar<sup>QEQE</sup>) state or in the unmodified (Tar<sup>EEEE</sup>) state. We observed that at high frequency the PSD

115 kept a constant value independent of the condition or strain (Figure 1C), indicating that in this  
116 frequency range the shot noise of the measurements sets the lower bound of measurable kinase  
117 activity fluctuations. For the chemotactic cells adapted in buffer, the measured PSD increased  
118 dramatically at lower frequency (roughly as  $1/\omega$ ), reaching a low frequency plateau at 0.015 Hz.  
119 Cells expressing Tar<sup>EEEE</sup> or Tar<sup>QEQE</sup> showed essentially identical behavior. Similar increase of  
120 the PSD at low frequency was observed for cells adapted to either 10 or 25  $\mu$ M MeAsp, although  
121 the amplitude of this increase was smaller than for the buffer-adapted cells. In contrast, the  
122 receptorless strain showed nearly constant noise level over the entire frequency range.  
123 The PSD was further used to calculate the average time autocorrelation function of the single-  
124 cell ratio (Figure 1D), which reflects the characteristic time scale of activity fluctuations. For  
125 cells adapted in buffer, the autocorrelation time constant was  $9.5 \pm 0.5$  s (as determined by a  
126 single exponential fit of the correlation function), which is similar to the characteristic time of  
127 the pathway activity fluctuation previously deduced from behavioral studies [17, 22]. Same  
128 characteristic time was observed in the MeAsp-adapted cells, although the amplitude of the  
129 correlation was considerably smaller in this case. Interestingly, on the longer time scale the  
130 autocorrelation function becomes weakly negative, indicating an overshoot that is likely caused  
131 by the negative feedback in the adaptation system [58]. No autocorrelation was observed for the  
132 receptorless cells, again confirming that the autocorrelation is due to fluctuations of the pathway  
133 activity.

134

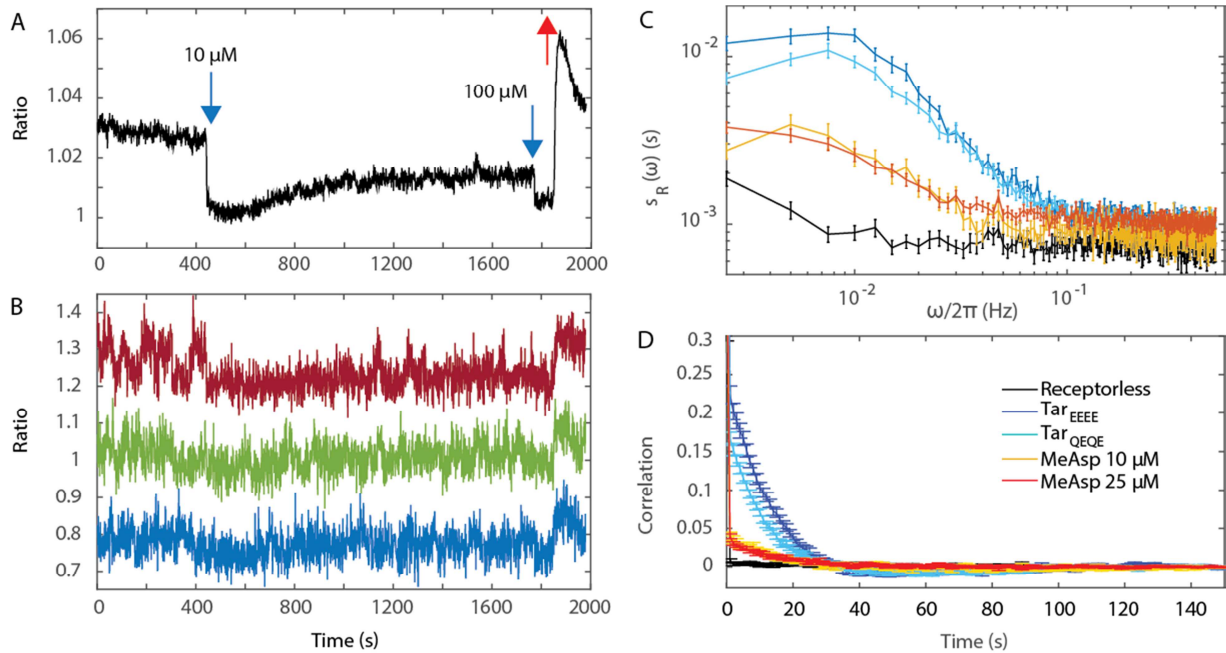

135

136 **Figure 1. Single-cell measurements of the pathway activity in *CheR<sup>+</sup> CheB<sup>+</sup>* cells.** (A) Time course of the

137 population-averaged YFP/CFP ratio for the *CheR<sup>+</sup> CheB<sup>+</sup>* strain expressing the FRET pair CheY-YFP and CheZ-

138 CFP and Tar as the sole receptor. Cells immobilized in a flow chamber under steady flow (see Materials and

139 Methods) were initially adapted in buffer and subsequently stimulated by addition of indicated concentrations of a

140 non-metabolizable chemoattractant MeAsp (blue arrows). The red arrow represents the removal of MeAsp. (B) Time

141 course of the YFP/CFP ratio for representative single cells during the experiments depicted in (A). The measurement

142 traces have been shifted along the y-axis to facilitate visualization. (C) Power spectral density (PSD) of the ratio

143 measurements for single cells expressing Tar<sup>EEEE</sup> or Tar<sup>QEQE</sup> in buffer (dark and light blue curves) and Tar<sup>QEQE</sup> cells

144 adapted to 10 μM (orange curve) or 25 μM MeAsp (red curve), as well as for the receptorless strain in buffer (black

145 curve). (D) The corresponding time autocorrelation functions of the single-cell ratio. The error bars represent

146 standard errors (SEM), and the sample sizes are 103 (receptorless strain), 203 (Tar<sup>EEEE</sup> in buffer), 265 (Tar<sup>QEQE</sup> in

147 buffer), 69 (10 μM) and 219 (25 μM) single cells coming from at least three biological repeats in each case.

148

### 149 Activity fluctuations in adaptation-deficient cells

150 We next tested whether the observed fluctuations could be solely explained by the action of the

151 adaptation system, by measuring the single-cell pathway activity in a strain lacking CheR and

152 CheB. Given the observed dependence of the fluctuation on the level of the pathway activity, we  
153 first tested the  $\Delta cheR cheB$  strain that was engineered to express Tar receptor in one-modified  
154 state ( $Tar^{QEEE}$ ), which closely mimics the average modification state and intermediate activity of  
155 Tar in  $CheR^+ CheB^+$  cells adapted in buffer [53, 59]. Expectedly, these cells showed a  
156 pronounced response but no adaptation to MeAsp, both at the population and single-cell level  
157 (Figure 2A). To our surprise, however, pathway activity in  $Tar^{QEEE}$  cells showed pronounced  
158 fluctuations despite the lack of adaptation system. In the strain expressing  $Tar^{QEQE}$  as the sole  
159 receptor, no fluctuations were observed in buffer, where  $Tar^{QEQE}$  is highly active and has low  
160 sensitivity to stimulation [59, 60]. Nevertheless, fluctuations were again observed when the  
161 activity of  $Tar^{QEQE}$  was partly inhibited by stimulating cells with an intermediate level of MeAsp  
162 (Figure 2B,C). In both cases, fluctuations were completely abolished upon saturating attractant  
163 stimulation, confirming their specificity.

164 Thus, at the intermediate level of pathway activity where the receptors are highly sensitive to  
165 stimulation, signaling fluctuations can be observed even in absence of the methylation system.  
166 Their PSD rose above shot noise at low frequency (roughly as  $1/\omega$ , see Figure 2C). Nevertheless,  
167 these methylation-independent fluctuations were slower than those observed in the  $CheR^+ CheB^+$   
168 strain (compare Figure 2C with Figure 1C), with a typical time scale of  $34 \pm 4$  s (determined by  
169 single exponential fit of the curves of Figure 2D).

170



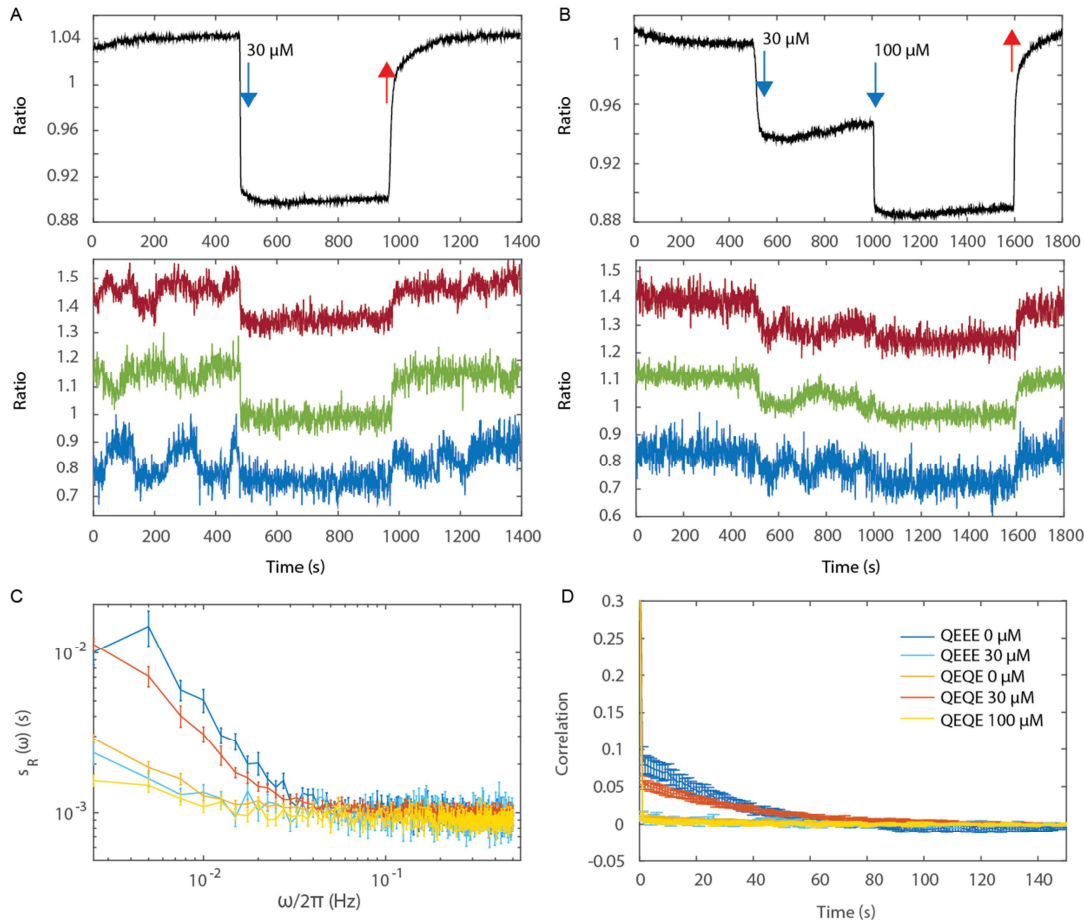

171

172 **Figure 2. Pathway activity fluctuations in  $\Delta cheR cheB$  cells.** (A) Time course of the population-averaged (black)

173 and typical single-cell (colors) YFP/CFP ratios for the  $\Delta cheR cheB$  strain expressing  $Tar^{QEEE}$  as the sole receptor, in

174 buffer and upon stimulation with 30  $\mu M$  MeAsp, as indicated by the blue arrows. The red arrow represents the

175 return to buffer condition. Measurements were performed as in Figure 1. (B) Same as (A) but for the  $\Delta cheR cheB$

176 strain expressing  $Tar^{QEQE}$  as the sole receptor and upon stimulation with 30  $\mu M$  and then 100  $\mu M$  MeAsp. (C) PSD

177 of the single cell ratio for  $Tar^{QEEE}$  in buffer (blue) or in 30  $\mu M$  MeAsp (cyan),  $Tar^{QEQE}$  in buffer (orange), in 30  $\mu M$

178 MeAsp (red) or in 100  $\mu M$  MeAsp (yellow). (D) Corresponding time autocorrelation functions of the single cell

179 ratios. Error bars represent standard errors (SEM), and the sample sizes are 153 ( $Tar^{QEEE}$ , buffer), 65 ( $Tar^{QEEE}$ , 30

180  $\mu M$ ), 471 ( $Tar^{QEQE}$ , buffer), 404 ( $Tar^{QEQE}$ , 30  $\mu M$ ) and 136 ( $Tar^{QEQE}$ , 100  $\mu M$ ) single cells coming from at least three

181 biological repeats in each case.

182

183 **Role of receptor cooperativity in signaling noise**

184 To investigate whether the observed fluctuations depend on cooperative interactions between  
185 chemotaxis receptors, we utilized a recently described CheW-X2 version of the adaptor protein  
186 CheW, which carries R117D and F122S amino acid replacements disrupting the formation of the  
187 receptor arrays without abolishing signaling [61]. Indeed, a  $\Delta cheRcheB$  strain expressing CheW-  
188 X2 and Tar<sup>QEQE</sup> showed basal activity and response to MeAsp which were similar to the  
189 respective strain that has the native CheW (Figure 3A and Figure 3 – Figure Supplement 1).  
190 Nevertheless, this strain showed no long-term fluctuations in the pathway activity, even when its  
191 activity was tuned to an intermediate level (Figure 3B,C). Similarly, the array disruption allowed  
192 signaling (Figure 3D) but abolished the long-term activity fluctuations in CheR<sup>+</sup> CheB<sup>+</sup> cells  
193 (Figure 3E,F). These results demonstrate that long-term fluctuations in activity observed either  
194 with or without the receptor methylation system require cooperative interactions between  
195 receptors.  
196

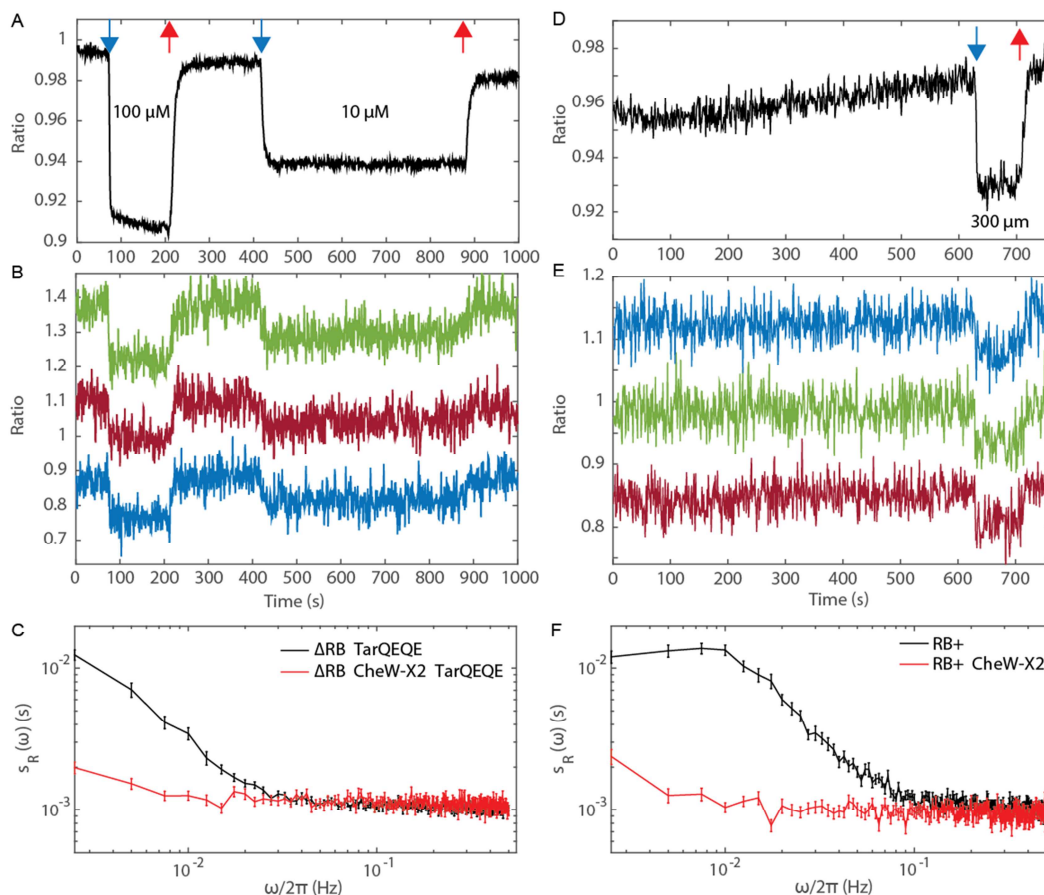

197

198 **Figure 3. Fluctuation analysis in CheW-X2 cells.** (A) Population averaged FRET ratio for adaptation deficient  
 199 strain carrying CheW-X2 and Tar<sup>QEQE</sup> as the sole receptor. The cells, which have a high activity in buffer, were first  
 200 exposed to 100  $\mu$ M MeAsp, which fully inhibited kinase activity, and then to 10  $\mu$ M MeAsp to bring them to  
 201 intermediate activity level. (B) Typical single cell FRET ratios for the same experiment as (A). The measurement  
 202 traces have been shifted along the y-axis to facilitate visualization. (C) Power spectral density of the ratio  
 203 fluctuations in CheW-X2  $\Delta$ cheRcheB strain (red) compared to the one in the equivalent strain carrying native CheW  
 204 (black – same data as Figure 2C). Disruption of signal amplification through cooperativity eliminated the  
 205 fluctuations. Error bars represent SEM, with sample sizes 404 (black) and 208 (red) cells. (D-E) Same as (A-B) in  
 206 CheR<sup>+</sup> CheB<sup>+</sup> strain carrying CheW-X2 and Tar<sup>QEEE</sup> as the sole receptor. The activity in buffer is intermediate level,  
 207 300  $\mu$ M MeAsp completely inhibited the kinase activity. (F) Power spectral density of the ratio fluctuations in this  
 208 strain (red) compared to the native CheW case (black – same data as Figure 1C with receptor Tar<sup>EEEE</sup>). Error bars  
 209 represent SEM, with sample sizes 202 (black) and 191 (red) cells. (A-F) Disruption of signal amplification through  
 210 cooperativity eliminated the fluctuations.

211

## 212 **Fluctuation dissipation relation for receptor clusters**

213 To better understand the origin of the observed fluctuations and their relation to receptor  
214 cooperativity, we considered the fluctuation dissipation theorem (FDT). It postulates that in  
215 systems at equilibrium, thermal fluctuations of a quantity are related, via the temperature, to its  
216 response to a small externally applied perturbation [62]. In out-of-equilibrium biological  
217 systems, the process generating the fluctuations can be characterized by introducing an effective  
218 temperature  $T_{\text{eff}}(\omega)$ , which in this case describes the energy scale and frequency content of the  
219 underlying out-of-equilibrium noise generating the fluctuations [63-66].

220 Such a fluctuation dissipation relation for the activity of a single receptor team can be used to  
221 predict a relation between the PSD and the average FRET response to stimulation. We first  
222 considered the simpler case of  $\Delta cheRcheB$  cells, using an Ising-like model [51, 67, 68] to  
223 describe cooperative receptor interactions in a team (see Material and Methods). For  $N_{\text{teams}}$   
224 signaling teams of strongly coupled signaling units in a cell, this yields:

$$225 \quad s_R(\omega) = -2 \frac{N T_{\text{eff}}}{N_{\text{teams}}} \lambda^2 \langle A \rangle (1 - \langle A \rangle) \text{Re}(\hat{g}(\omega)) + \epsilon_0^2, \quad (1)$$

226 where  $g$  is the normalized pathway response,  $N$  is the number of effective cooperative units in a  
227 team,  $\langle A \rangle$  is the average activity around which fluctuations occur,  $R$  is the YFP/CFP ratio,  $R =$   
228  $\lambda A + \mu$  [54], and  $\epsilon_0^2$  is the measurement shot noise. Importantly,  $g$  could be experimentally  
229 determined by measuring the FRET response to stepwise attractant stimulation as  $g(t) =$   
230  $\Delta R(t) / \Delta R(+\infty)$  (Figure 4A). The values of  $\lambda$  could be estimated from experimental data (Figure  
231 1A and 2A-B) as  $\lambda_{RB-} \simeq 0.1$  and  $\lambda_{RB+} \simeq 0.09$ .

232 For  $\Delta cheRcheB$  cells, we observed that  $\text{Re}(\hat{g}(\omega))$  – the real part of the Fourier transform of  $g$  –  
233 was proportional to  $s_R(\omega)$  for  $\langle A \rangle \simeq 0.5$ , at low frequencies (Figure 4B), as predicted by

234 Equation 1, also yielding the shot noise  $\epsilon_0^2 \simeq 10^{-3}$ . Furthermore, the PSD of these cells followed  
235 the scaling  $\langle A \rangle (1 - \langle A \rangle)$  predicted by the FDT, as evident for subpopulations of cells sorted  
236 according to their activity (Figure 4 – Figure Supplement 1). Thus, our model appears to  
237 accurately describe the observed long-time activity fluctuations in  $\Delta cheRcheB$  cells, suggesting  
238 that these fluctuations could in principle be explained as the consequence of white noise driving  
239 an equilibrium system with the measured latency in the response to stimulation (Figure 4A).  
240 Notably, this latency in response has been previously observed and attributed to slow changes in  
241 packing of receptors within clusters [52]. Consistent with this interpretation, the CheW-X2  
242  $\Delta cheRcheB$  strain with disrupted receptor clustering showed no response latency (Figure 3 –  
243 Figure Supplement 2) and no long-term activity fluctuations (Figure 3B,C).  
244 Equation 1 further allowed us to estimate  $T_{\text{eff}}$ , the energy scale of the white noise driving activity  
245 fluctuations in the adaptation-deficient cells, which was nearly independent of  $\omega$  (Figure 4D).  
246 For  $\text{Tar}^{\text{QEQE}}$  at our expression level,  $N \sim 14$  allosteric units [56, 59, 69, 70] yielded  $kT_{\text{eff}}/$   
247  $N_{\text{teams}} = 5.5 \cdot 10^{-3} kT$ . To accurately count the number of signaling teams, the dose-response  
248 curve of  $\Delta cheRcheB$  CheW-X2 expressing  $\text{Tar}^{\text{QEQE}}$  (Figure 3 – Figure Supplement 1) was fitted  
249 using the MWC model, yielding a cooperativity number of  $N \simeq 2$ . Since in this strain  
250 chemosensory complexes are believed to consist of two trimers of receptor dimers coupled to  
251 one CheA dimer [47, 61], this result suggests that  $N$  effectively accounts for the number of  
252 trimer of dimers (TD) in the signaling team. Assuming  $N_{\text{Tar}} \sim 10^4$  receptor dimers under our  
253 induction level [42, 59], we obtain  $N_{\text{teams}} = N_{\text{Tar}} / 3N \simeq 240$  and  $kT_{\text{eff}} \sim 1.3 kT$  (Figure  
254 4D). Thus, thermal fluctuations coupled to the long-term dynamics of the receptor cluster should  
255 in principle be strong enough to generate the observed activity fluctuations.

256

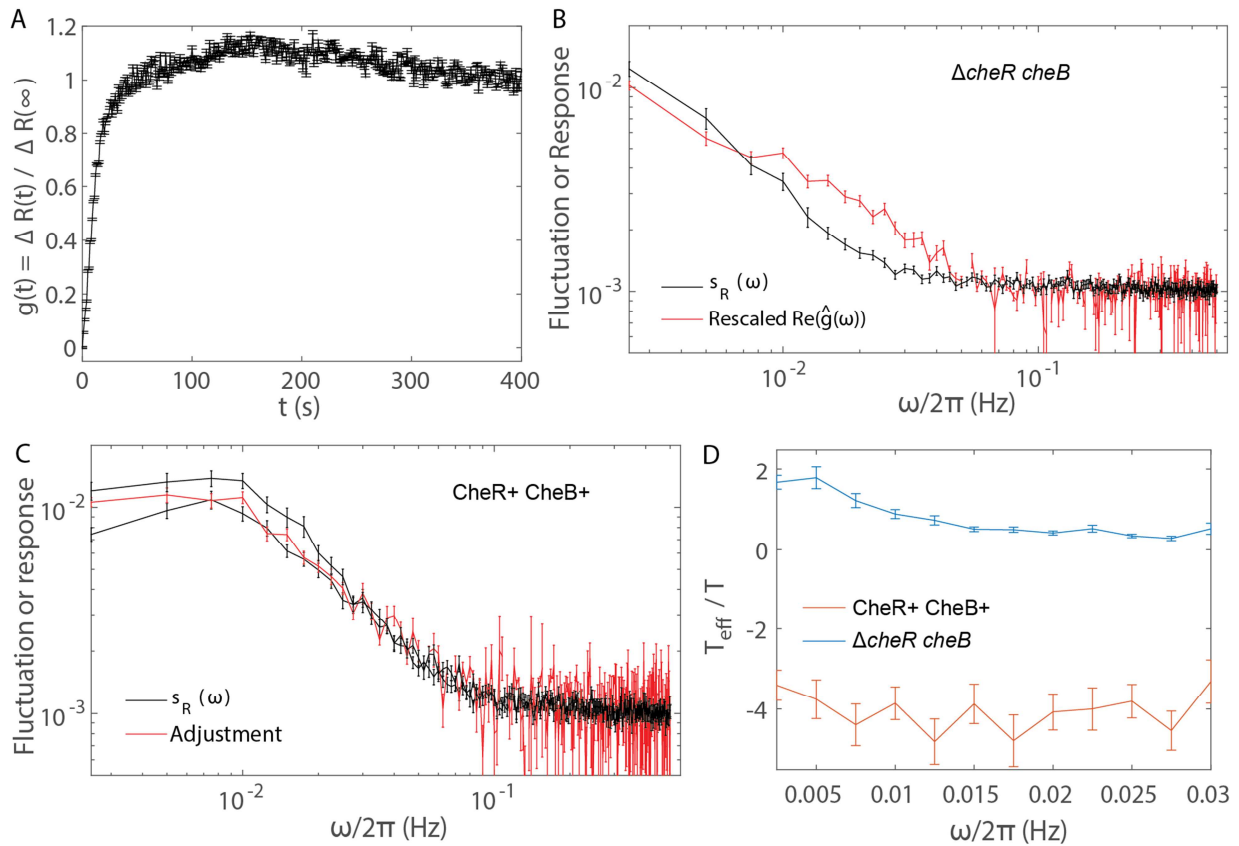

257

258 **Figure 4. Fluctuation dissipation analysis of the pathway activity.** (A) Normalized response function  $g(t)$  in the

259 adaptation deficient case, evaluated in  $\Delta cheR cheB + Tar^{QEQE}$  responding to a change from buffer condition to 30

260  $\mu M$  MeAsp. (B) The PSD of the activity in adaptation deficient strains at activity  $A = 0.5$  (black) was proportional

261 to the response function in the frequency domain  $Re(\hat{g}(\omega))$  in the low frequency range, and adjusted to Eq. 1 (red).

262 (C) The PSDs in adaptation proficient cells at  $A = 0.5$  (black) were adjusted to Eq. 2, providing an estimate of the

263 response function in adaptive cells (red). (D) Evaluated FDT ratios in both cases were constant, in the range of

264 frequency where measurement noise is negligible. In all panels, error bars represent SEM, with sample sizes 540

265 ( $\Delta cheR cheB$ ) and 203 + 265 ( $CheR^+ CheB^+$ ) single cells in at least 5 biological repeats.

266

267 Interestingly, we also observed that fluctuations were unaffected by the expression level of the

268 receptors (Figure 4 – Figure Supplement 2). In the FDT framework, this would be the case only

269 if  $N/N_{teams} = 3N^2/N_{Tar}$  is constant. This indeed appears to agree with previous observation that the

270 cooperativity rises with expression level of  $\text{Tar}^{\text{QEQE}}$  in a way that  $N^2/N_{\text{Tar}}$  remains unchanged  
271 [59].

272 In presence of the adaptation enzymes, an effective fluctuation dissipation relation could be  
273 predicted in the same theoretical framework, additionally including adaptation described  
274 according to the classical two-state models of receptors [13, 69, 71], as

$$275 \quad s_R^+(\omega) = 2k|T_{\text{eff}}| \frac{N\langle A \rangle(1-\langle A \rangle)}{N_{\text{teams}}} \lambda^2 \frac{\text{Re}(\hat{g}(\omega)) + \omega_{RB} |\hat{g}(\omega)|^2}{1 + 2\omega_{RB} \text{Re}(\hat{g}(\omega)) + (\omega_{RB} |\hat{g}(\omega)|)^2} + \epsilon_0^2, \quad (2)$$

276 where  $\omega_{RB} = N\langle A \rangle(1 - \langle A \rangle) k_1(k_R + k_B(\langle A \rangle))$  is the activity-dependent rate of adaptation (see  
277 Material and Methods). The experimental  $s_R(\omega)$  for  $\text{CheR}^+ \text{CheB}^+$  cells was adjusted to  
278 Equation 2, using the function  $\hat{g}(\omega)$  computed for  $\Delta\text{cheRcheB}$ , the prefactor,  $\epsilon_0^2$  and  $\omega_{RB}$  being  
279 adjustable parameters. The adjusted curve and the experimental PSD were in excellent  
280 agreement for the whole range of frequencies (Figure 4C). The estimated value of the  
281 methylation-dependent memory was  $\tau_{RB} = 1/\omega_{RB} = 7.1 \text{ s}$ , consistent with previous estimates  
282 [22], and the effective temperature was  $kT_{\text{eff}} = -3.7 kT$ , assuming  $\lambda = 0.09$  and other  
283 parameters as in the  $\Delta\text{cheRcheB}$  case. We further considered that the adaptation enzymes are  
284 much fewer than their receptor substrates – only 15% of the receptors can be (de)methylated at  
285 any given time, since only 140 CheR and 240 CheB molecules [42] act on an assistance  
286 neighborhood of 7 and 5 receptor dimers respectively [43]. Given that the energy consumed by  
287 one methylation reaction is  $\Delta H_m \sim 30 \text{ kT}$  [72], our estimate of the effective temperature in  $\text{CheR}^+$   
288  $\text{CheB}^+$  cells is consistent with random methylation events being the main driving force behind  
289 the activity fluctuations ( $kT_{\text{eff}} - kT \simeq -0.15\Delta H_m$ ). Importantly, the sign of  $kT_{\text{eff}}$  for  $\text{CheR}^+$   
290  $\text{CheB}^+$  cells was negative, consistent with energy dissipation occurring during methylation-  
291 driven activity fluctuations [72-74]: Adaptation actively translates activity changes into receptor  
292 free energy gains – since (de)methylation events increase the energy of the receptors, before their



293 activity eventually actuates [74] – the opposite of the passive behavior of the receptors. This  
294 reversal of causality translates into a negative effective temperature on the time scales  
295 considered, where adaptation is the dominant cause of activity changes. Within our model, the  
296 loss of slow fluctuations upon disruption of clusters in  $\text{CheR}^+ \text{CheB}^+$  cells (Figure 3F) could be  
297 easily explained by the dependence of  $s_R(\omega)$  on the size  $N$  of signaling teams (Equation 2),  
298 meaning that reduction of  $N$  to 2 should largely abolish fluctuations in activity even in presence  
299 of the methylation system.

300

## 301 **Discussion**

302

303 The bacterial chemotaxis pathway has been extensively used as a model for quantitative analysis  
304 of signal transduction [10, 37, 46]. One fascinating feature of the chemotaxis pathway is the  
305 amplification of chemotactic signals through cooperative interactions within teams of clustered  
306 receptors, where  $\sim 10$ -20 receptor dimers show concerted transitions between active and inactive  
307 states [48-51, 75, 76]. Another much celebrated property of the pathway is robustness against  
308 external and internal perturbations, which largely relies on its methylation-based adaptation  
309 system [13, 14, 16, 40, 60]. At the same time, the stochastic activity of the adaptation enzymes  
310 was also proposed to induce variability in the signaling output on the time scale of tens of  
311 seconds [17, 18, 30], which might enhance environmental exploration [18, 23, 25, 27, 28].

312 Here we combine experimental and mathematical analyses to demonstrate that both, the  
313 adaptation system and receptor clustering contribute to the signaling noise in the chemotaxis  
314 pathway. Our single-cell FRET measurements reveal that large pathway activity fluctuations  
315 occur both in presence and in absence of the adaptation system, clearly showing that the



316 stochasticity of receptor methylation is not the sole cause of the pathway noise. The observed  
317 fluctuations could be analyzed using the fluctuation dissipation theorem (FDT) and deviations  
318 thereof. Multiple factors were accounted for, which apparently contribute to the overall pathway  
319 noise: (i) an input white noise, (ii) the amplification of this noise by cooperative interactions  
320 among receptors, (iii) the delayed response function of receptor clusters, and (iv) the dynamics of  
321 the methylation system.

322 Our analysis suggests that, in adaptation deficient strains, the input noise likely originates from  
323 thermal fluctuations of receptor activity, and it is converted into long-term pathway activity  
324 fluctuations because of the latency observed in the response of clustered receptors. This observed  
325 latency of response is consistent with the previous work that attributed it to changes in packing  
326 of receptors within clusters [52]. Indeed, in our experiments it was abolished by mutations that  
327 disrupt clustering. Notably, on the studied range of time scales the proposed contribution of the  
328 high-frequency ligand binding noise [77] to overall fluctuations must be very small, since the  
329 observed power spectral densities depended on activity but not on the absolute ligand  
330 concentration. Our analysis also suggests that an effective subunit of the allosteric signaling  
331 teams corresponds to one trimer of dimers, rather than a dimer itself as assumed in previous  
332 computational models [59, 71]. This might be explained by the finite receptor-kinase coupling  
333 within signaling teams, and it is consistent with a previous biochemical demonstration that a  
334 trimer is necessary to activate CheA [78]. Notably, it could be easily reconciled with the  
335 previous formulations of the MWC models by rescaling the free-energy change per methylated  
336 glutamate by a factor of three.

337 In presence of the adaptation system this first source of noise seems to be added to the noise  
338 coming from the stochasticity of methylation events. The adaptation system not only shifts the

339 frequency spectrum of fluctuations but also eliminates the latency of the response to stimuli, thus  
340 likely accelerating the response through its negative feedback activity. However, receptor  
341 clustering is required for the observed activity fluctuations even in presence of the adaptation  
342 system, likely because of signal amplification and accelerated adaptation dynamics within  
343 clusters [61]. Thus, although the receptor methylation system is clearly important for shaping the  
344 overall pathway noise, the resulting picture of the signaling noise in the native chemotaxis  
345 pathway is more complex than previously suggested. Altogether, our analysis shows that at least  
346 two sources of noise, with fairly comparable strengths, get first processed through a slow  
347 responding amplifier (the chemoreceptor cluster) and then fed back through the methylation  
348 system, resulting in complex colored fluctuations of the pathway activity and therefore of the  
349 swimming behavior.

350 More generally, our study provides another example of the general relation between fluctuations  
351 and response in biological systems [63-65, 79]. In these systems, the fluctuations are commonly  
352 shaped by active, non-equilibrium processes, the properties of which can be inferred from the  
353 deviations from the FDT. The approach of quantifying such deviations by means of an effective  
354 temperature, or fluctuation dissipation ratio, has been used in a variety of out-of-equilibrium  
355 systems [66], from glasses to biological systems. Although in some systems, *e.g.* glasses, this  
356 ratio can have indeed properties normally associated with the thermodynamic temperature, in  
357 biological systems it rather relates to the energy scale and frequency content of the underlying  
358 out-of-equilibrium processes, as demonstrated in the earing system [64] or in the active transport  
359 in eukaryotic cells [63, 65, 79]. For the chemotaxis pathway, our analysis indeed enabled us to  
360 distinguish between passive and active sources of noise, and also provided energy scale for the  
361 active process shaping the fluctuations that is well in agreement with the biochemical estimates.

362 Thus, fluctuation analyses may in general provide a valuable tool for studying cell signaling  
363 processes, from bacteria to mammals.

364

365

## 366 **Material and Methods**

367

### 368 **Cell growth, media and sample preparation**

369 *E. coli* strains and plasmids are described in Table S1 and Table S2, respectively. Cells carrying  
370 plasmids that encode indicated receptors and the FRET pair were grown at 30°C overnight in  
371 tryptone broth (TB) supplemented with appropriate antibiotics. The culture was subsequently  
372 diluted 17:1000 in TB containing antibiotics, 2 µM salicylate (unless otherwise stated) for  
373 induction of Tar and 200 µM isopropyl β-D-1-thiogalactopyranoside (IPTG) for induction of the  
374 FRET pair, and grown at 34°C under vigorous shaking (275 rpm) to an OD<sub>600</sub> = 0.55. Bacteria  
375 were harvested by centrifugation, washed thrice in tethering buffer (10 mM KPO<sub>4</sub>, 0.1 mM  
376 EDTA, 1 µM methionine, 10 mM lactic acid, pH 7) and stored at least 20 minutes at 4°C prior to  
377 the experiments.

378

### 379 **Microscopy**

380 Bacterial cells were attached to poly-lysine coated slides which were subsequently fixed at the  
381 bottom of a custom-made, air-tight flow chamber, which enables a constant flow of fresh  
382 tethering buffer using a syringe pump (Pump 11 Elite, Harvard Apparatus, Holliston,  
383 Massachusetts, United States) at 0.5 ml/min. This flow was further used to stimulate cells with  
384 indicated concentrations of α-methyl-D,L-aspartate (MeAsp). The cells were observed at 40x

385 magnification (NA = 0.95) using an automated inverted microscope (Nikon Ti Eclipse, Nikon  
386 Instruments, Tokyo, Japan) controlled by the NIS-Elements AR software (Nikon Instruments).  
387 The cells were illuminated using a 436/20 nm filtered LED light (X-cite exacte, Lumen  
388 Dynamics, Mississauga, Canada), and images were continuously recorded at a rate of 1 frame  
389 per second in two spectral channels corresponding to CFP fluorescence (475/20 nm) and YFP  
390 fluorescence (542/27 nm) using an optosplit (OptoSplit II, CAIRN Research, Faversham, United  
391 Kingdom) and the Andor Ixon 897-X3 EMCCD camera (Andor Technology, Belfast, UK) with  
392 EM Gain 300 and exposure time of 1 s. For each measurement, the field of view was chosen to  
393 contain both a small region of high density with confluent cells and a few hundred well-  
394 separated single cells. During our approximately 30 min long measurements, the focus was  
395 maintained using the Nikon perfect focus system.

396

### 397 **Image processing and data analysis**

398 The image analysis was performed using the NIS-Elements AR software. The CFP and YFP  
399 images, each recorded by a half of the camera chip (256 x 512 px<sup>2</sup>, 1 px = 0.40 μm), were  
400 aligned with each other by manual image registration. A gray average of the two channels was  
401 then delineated to enhance contrast and create binary masks with a user-defined, experiment-  
402 specific threshold. Individual cells were detected by segmentation of the thresholded image into  
403 individual objects, filtered according to size (3-50 μm<sup>2</sup>) and shape (excentricity < 0.86). This  
404 step resulted in a collection of distinct regions of interest (ROIs) for each frame of the movie.  
405 The ROIs were then tracked from frame to frame, using the NIS build-in tracking algorithm.  
406 Only ROIs that could be tracked over the entire duration of the experiment were further  
407 analyzed. The selected ROIs were then inspected manually and those not representing individual

408 single cells well attached to the cover glass were discarded. Each individual measurement  
409 contained on the order of 100 tracked single cells.

410 All further analyses were carried out using MATLAB 8.4 R2014b (The MathWorks, Inc.,  
411 Natick, Massachusetts, United States). For each tracked cell, the average CFP and YFP values  
412 over the ROI were extracted as a function of time. These values were also extracted for an ROI  
413 corresponding to the confluent population of cells. The ratio  $R$  of the YFP signal to the CFP  
414 signal was computed for both the single cells and the population, with the population response  
415 being used as a reference. Cells with a ratio change of less than 10% of the population response  
416 were discarded as unresponsive. The PSD was computed over  $T=400$ -frames long segments as

$$417 \quad s_R(\omega) = \frac{1}{T} \left\langle \frac{\widehat{R}_i(\omega)\widehat{R}_i^*(\omega)}{\overline{R_i^2}} \right\rangle_i, \quad (3)$$

418 where  $\widehat{R}_i(\omega)$  is the discrete Fourier transform of the ratio of cell  $i$  at frequency  $\omega/2\pi$ ,  $\widehat{R}_i^*$  its  
419 complex conjugate,  $\overline{\cdot}$  represents a temporal average over the given time interval and  $\langle \cdot \rangle_i$  an  
420 average over all single cells considered. The error for the PSD was evaluated as

421  $\frac{1}{N_c T} \text{var} \left( \frac{\widehat{R}_i(\omega)\widehat{R}_i^*(\omega)}{\overline{R_i^2}} \right)_i$ , where  $N_c$  is the number of cells. The time autocorrelation function is

422 simply the inverse Fourier transform of the PSD.

423

## 424 **Modeling activity fluctuations in the framework of fluctuation dissipation relation**

### 425 *Ising model for the chemoreceptor cluster*

426 The chemosensory complexes are described using an Ising model, in which the receptors can be  
427 in two states (OFF, which inhibits kinase, and ON, which activates kinase). The receptors and  
428 kinases are coupled, and the free energy difference between ON and OFF state is  $\Delta f_0 = \gamma(m) +$   
429  $\eta(c)$  for a single receptor, with  $\eta(c) = \ln \left( \left( 1 + \frac{c}{K_{OFF}} \right) / \left( 1 + \frac{c}{K_{ON}} \right) \right)$  being the contribution of

430 attractant binding and  $\gamma(m) = k_0 - k_1 m$  being the contribution of the receptor methylation. The  
431 Hamiltonian of the whole sensory cluster is  $H = H_{int} + \sum_{k=1}^{N_{Tar}} a_k \Delta f_0$ , with  $a_k$  being the  
432 Boolean state of the receptor  $k$  and  $H_{int}$  describing the coupling between and among receptors  
433 and kinases. The interaction term  $H_{int}$  does not need to be specified for the following analysis,  
434 but it would be of the form  $H_{int} = -J_{aa} \sum_{i,j} (A_i - 0.5) S_{i,j} (A_j - 0.5) - J_{ar} \sum_{i,k} (A_i -$   
435  $0.5) V_{i,k} (a_k - 0.5) - J_{rr} \sum_{l,k} (a_l - 0.5) W_{l,k} (a_k - 0.5)$ , where the  $J$  are the coupling strengths  
436 and  $S$ ,  $V$  and  $W$  describe the network by determining whether two components are coupled and  
437  $A_i$  is the Boolean activity of kinase  $i$ .

438

#### 439 ***Phenomenological MWC description of the average response***

440 Since analytical solutions for Ising models exist only in certain specific cases, an effective  
441 Monod-Wyman-Changeux (MWC) description of the system, extended to include the observed  
442 long-term response dynamics (see main text), was used to describe the average response of the  
443 system. The MWC model is known to well describe the pathway response, similarly to the Ising  
444 model [48, 50, 71, 80]. It considers that the cluster is divided in teams in which  $N$  allosteric units  
445 are coupled with infinite strength. Each team is then a two-state binary system, which can be  
446 either fully active or fully inactive. The probability of observing a team in the active state is  
447 given by  $A = \frac{1}{1 + \exp(N \Delta f_0)}$ , with  $\Delta f_0$  as above. The average methylation state of the team evolves  
448 under the action of CheR and CheB according to  $\frac{dm}{dt} = k_R (1 - A) - k_B A$ , with  $k_R$  and  $k_B$   
449 being the rates of methylation and de-methylation, respectively [69]. In the classical MWC  
450 formulation, the basic subunit of the allosteric team is a receptor dimer. In contrast, our analysis  
451 suggests that, although  $N$  remains a measure of the extent of correlations, the allosteric subunits

452 rather consist of three dimers, which might be due to the actual finite coupling between the  
453 kinases and associated receptor dimers.

454

#### 455 ***Phenomenological response function model for $\Delta cheRcheB$ cells***

456 The dynamic susceptibility of the state of a single receptor  $\chi_a(t)$  in response to a perturbation  
457  $+\epsilon$  of the free energy difference  $\Delta f_0$  is defined as  $\langle \delta a(t) \rangle = \int_{-\infty}^t -\epsilon(\tau) \chi_a(t - \tau) d\tau$ , where  $\langle \cdot \rangle$   
458 is an ensemble average. In the case of a constant perturbation  $\epsilon_0$  starting at  $t = 0$ ,  $\langle \delta a(t) \rangle =$   
459  $-\epsilon_0 \int_0^t \chi_a(\tau) d\tau$ . It is expected that  $\langle \delta a(t) \rangle = \langle \delta A(t) \rangle$  on the time scales of our experiments. In  
460 the MWC framework, the same perturbation reduces the average activity by  $\delta A_{MWC} =$   
461  $-N \langle A \rangle (1 - \langle A \rangle) \epsilon_0$ , and  $\chi_a(\tau)$  is then a delta function. In order to account for the long-term  
462 response dynamics observed in the experiments, we constructed a phenomenological model in  
463 which the activity can differ from the MWC expectation but evolves in time towards it, leading  
464 to a more complex form of  $\chi_a(\tau)$ . The MWC model was assumed to describe the static  
465 properties of the system, so that  $\langle \delta a(+\infty) \rangle = \langle \delta A(+\infty) \rangle = \delta A_{MWC}$ , which  
466 yields  $\int_0^{+\infty} \chi_a(\tau) d\tau = N \langle A \rangle (1 - \langle A \rangle)$ . We experimentally defined the function  $g(t)$ , measured  
467 as the response of a  $\Delta cheRcheB$  strain to step-like attractant stimulation, as  $g(t) =$   
468  $\Delta R(t) / \Delta R(+\infty) = \langle \delta A(t) \rangle / \langle \delta A(+\infty) \rangle$ , which goes from 0 at  $t = 0$  to 1 at  $t = +\infty$ .

469 The theoretical identification and the experimental definition were then combined to form the  
470 phenomenological model of the dynamic susceptibility of a receptor in the  $\Delta cheRcheB$  strain  
471 as  $\int_0^t \chi_a(\tau) d\tau = NA(1 - A)g(t)$ , which is expressed in Fourier space as

$$\hat{\chi}_a(\omega) = NA(1 - A)i\omega \hat{g}(\omega) \quad (4)$$

472 Here the Fourier transform of  $x$  is defined as

$$\hat{x}(\omega) = \int_{-\infty}^{+\infty} x(t) e^{-i\omega t} dt \quad (5)$$

473

474 ***Phenomenological response function model for CheR+ CheB+ cells***

475 We assumed that in presence of the adaptation system the receptor cluster responds to free  
 476 energy perturbations in the same way as in the adaptation-deficient cells, but this response  
 477 induces a methylation change adding up to the free energy perturbation. For a small sinusoidal  
 478 perturbation of the free energy difference  $\epsilon(\omega)$ , the resulting perturbations for the average  
 479 activity and methylation are then given in Fourier space by the set of equations

$$\langle \delta a(\omega) \rangle = NA(1 - A)i\omega \hat{g}(\omega)(-\epsilon(\omega) + k_1 \langle \delta m(\omega) \rangle) \quad (6)$$

$$i \omega \langle \delta m \rangle = -(k_R + k_B) \langle \delta a(\omega) \rangle \quad (7)$$

480 Defining  $X_A^\infty = NA(1 - A)$  and  $\omega_{RB} = X_A^\infty k_1(k_R + k_B)$ , this set of equations is easily solved  
 481 as

$$\langle \delta a(\omega) \rangle = \frac{X_A^\infty i\omega \hat{g}(\omega)}{1 + \omega_{RB} \hat{g}(\omega)} (-\epsilon(\omega)) \quad (8)$$

482 We thus defined the dynamic susceptibility in this case as

$$\hat{\chi}_a^+(\omega) = \frac{X_A^\infty i\omega \hat{g}(\omega)}{1 + \omega_{RB} \hat{g}(\omega)} \quad (9)$$

483 Note that the  $\Delta cheR cheB$  case is obtained again if  $\omega_{RB} = 0$ .

484

485 ***Fluctuation dissipation relation***

486 For the allosteric chemosensory complexes described by the Ising model, the fluctuation  
 487 dissipation relation associated to the state  $a$  of a chemoreceptor is given by  $s_a(\omega) =$



488  $-\frac{2kT}{\omega} \text{Im} \hat{\chi}_a(\omega)$ , where  $\hat{\chi}_a(\omega)$  is defined as above [62], assuming the system is in equilibrium.

489 The power spectral density of the state of the receptor is then

$$s_a(\omega) = -2kT \text{Im} \left( \frac{X_A^\infty i \hat{g}(\omega)}{1 + \omega_{RB} \hat{g}(\omega)} \right) \\ = -2kT X_A^\infty \frac{\text{Re}(\hat{g}(\omega)) + \omega_{RB} |\hat{g}(\omega)|^2}{1 + 2\omega_{RB} \text{Re}(\hat{g}(\omega)) + (\omega_{RB} |\hat{g}(\omega)|)^2} \quad (7)$$

490 We then assumed that  $N_r$  neighboring receptors constitute a signaling team where all receptors

491 and associated kinases are in the same state (either OFF/inactive or ON/active) at a given time.

492 There are therefore  $N_{teams} = N_{Tar}/N_r$  teams. The PSD of the average activity of the cell is

493 then  $s_{A_{cell}}(\omega) = s_a(\omega)/N_{teams}$ . This yields the PSD of the YFP/CFP ratio, the fluctuations of

494 which are proportional to the ones of  $A_{cell}$  with the factor  $\lambda$ ,  $s_R(\omega) = \lambda^2 s_{A_{cell}}(\omega)$ , leading to

495 equations 1 and 2, which also account for a constant value of ratio shot noise  $\epsilon_0^2$ . In the case

496 where the origin of the noise is an out-of-equilibrium white noise, deviations to the equilibrium

497 FDT were quantified by introducing an effective temperature  $T_{\text{eff}}$ , normalized as the fluctuation

498 dissipation ratio  $T_{\text{eff}}/T$ , which characterizes the energy scale of the underlying noise in activity.

499 Note that although we expressed the fluctuation dissipation relation in terms of activity, which

500 allows us to directly compare the analysis with experimental data, this relation can be formulated

501 for any variable (e.g., receptor conformation) that itself determines the activity.

502

### 503 **Evaluation of $\lambda$**

504 In the non-adapting  $\text{Tar}^{\text{QEQE}}$  strain, the value of  $\lambda_{RB-}$  was estimated as the difference, averaged

505 over all cells, between the YFP/CFP ratio in buffer, where the activity should be maximal (i.e.,

506 equal to one), and the ratio upon saturating stimulation with 100  $\mu\text{M}$  MeAsp as  $\lambda_{RB-} =$

507  $\langle \bar{R}(0) \rangle - \langle \bar{R}(100 \mu M) \rangle$ . In the adaptation-proficient strains,  $\lambda_{RB+}$  was evaluated as the  
508 difference between the ratio value during the brief stimulation with 100  $\mu M$  MeAsp and the peak  
509 of the ratio upon removal of the stimulation (assuming that this value corresponds to maximal  
510 activity) averaging the ratio value over single cells.

511

### 512 **Activity sorting**

513 For Tar<sup>QEQE</sup> receptors in non-adapting strains, we assumed that all the receptors are fully active  
514 in buffer conditions and fully inactive upon stimulation with 100  $\mu M$  MeAsp. The pathway  
515 activity in each cell was thus evaluated as  $A = 1 - \frac{\bar{R}(preStim-30\mu M) - \bar{R}(30\mu M)}{\bar{R}(preStim-100\mu M) - \bar{R}(100\mu M)}$ . The use of the  
516 two different prestimulus values in buffer enables to minimize the effect of FRET baseline  
517 variation due to bleaching of fluorophores during image acquisition. Cells were then sorted  
518 according to their activity and divided into  $n$  equal subpopulations, and for each subpopulation  
519 the average PSD  $\langle s_R(\omega) \rangle_A$  at average activity  $A$  of the subpopulation was evaluated for the set of  
520 frequencies displayed in Figure 4 – Figure Supplement 1. This procedure was implemented for  
521 several values of  $n$ , namely  $n = 10, 9, 6, 5$  and 4, and the whole resulting data was used to plot  
522  $\langle s_R(\omega) \rangle_A$  as a function of  $A$ .

523

524

### 525 **Acknowledgements**

526 The authors would like to thank R. Somavanshi for assistance with experiments and N.S.  
527 Wingreen for comments on the manuscript.

528

### 529 **Competing Interests**

530 The authors declare no competing interests.

531

## 532 **References**

- 533 [1] ten Wolde P. R., Becker N. B., Ouldridge T. E. and Mugler A. *Fundamental Limits to*  
534 *Cellular Sensing*. Journal of Statistical Physics (2016) **162**, 1395, doi:10.1007/s10955-  
535 015-1440-5
- 536 [2] Rao C. V., Wolf D. M. and Arkin A. P. *Control, exploitation and tolerance of*  
537 *intracellular noise*. Nature (2002) **420**, 231, doi:10.1038/nature01258
- 538 [3] Tsimring L. S. *Noise in biology*. Reports on Progress in Physics (2014) **77**,  
539 doi:10.1088/0034-4885/77/2/026601
- 540 [4] Raj A. and van Oudenaarden A. *Nature, Nurture, or Chance: Stochastic Gene*  
541 *Expression and Its Consequences*. Cell (2008) **135**, 216, doi:10.1016/j.cell.2008.09.050
- 542 [5] Elowitz M. B., Levine A. J., Siggia E. D. and Swain P. S. *Stochastic gene expression in*  
543 *a single cell*. Science (2002) **297**, 1183, doi:10.1126/science.1070919
- 544 [6] Balazsi G., van Oudenaarden A. and Collins J. J. *Cellular Decision Making and*  
545 *Biological Noise: From Microbes to Mammals*. Cell (2011) **144**, 910,  
546 doi:10.1016/j.cell.2011.01.030
- 547 [7] Eldar A. and Elowitz M. B. *Functional roles for noise in genetic circuits*. Nature (2010)  
548 **467**, 167, doi:10.1038/nature09326
- 549 [8] Veening J. W., Smits W. K. and Kuipers O. P. *Bistability, Epigenetics, and Bet-Hedging*  
550 *in Bacteria*. Annual Review of Microbiology (2008) **62**, 193,  
551 doi:10.1146/annurev.micro.62.081307.163002
- 552 [9] Lan G. H. and Tu Y. H. *Information processing in bacteria: memory, computation, and*  
553 *statistical physics: a key issues review*. Reports on Progress in Physics (2016) **79**,  
554 doi:10.1088/0034-4885/79/5/052601
- 555 [10] Micali G. and Endres R. G. *Bacterial chemotaxis: information processing,*  
556 *thermodynamics, and behavior*. Current Opinion in Microbiology (2016) **30**, 8,  
557 doi:10.1016/j.mib.2015.12.001
- 558 [11] Levchenko A. and Nemenman I. *Cellular noise and information transmission*. Current  
559 Opinion in Biotechnology (2014) **28**, 156, doi:10.1016/j.copbio.2014.05.002

- 560 [12] Bowsher C. G. and Swain P. S. *Environmental sensing, information transfer, and*  
561 *cellular decision-making*. *Current Opinion in Biotechnology* (2014) **28**, 149,  
562 doi:10.1016/j.copbio.2014.04.010
- 563 [13] Barkai N. and Leibler S. *Robustness in simple biochemical networks*. *Nature* (1997)  
564 **387**, 913, doi:10.1038/43199
- 565 [14] Kollmann M., Lovdok L., Bartholome K., Timmer J. and Sourjik V. *Design principles of*  
566 *a bacterial signalling network*. *Nature* (2005) **438**, 504, doi:10.1038/nature04228
- 567 [15] Shinar G., Milo R., Martinez M. R. and Alon U. *Input-output robustness in simple*  
568 *bacterial signaling systems*. *Proceedings of the National Academy of Sciences of the*  
569 *United States of America* (2007) **104**, 19931, doi:10.1073/pnas.0706792104
- 570 [16] Alon U., Surette M. G., Barkai N. and Leibler S. *Robustness in bacterial chemotaxis*.  
571 *Nature* (1999) **397**, 168, doi:10.1038/16483
- 572 [17] Korobkova E., Emonet T., Vilar J. M. G., Shimizu T. S. and Cluzel P. *From molecular*  
573 *noise to behavioural variability in a single bacterium*. *Nature* (2004) **428**, 574,  
574 doi:10.1038/nature02404
- 575 [18] Emonet T. and Cluzel P. *Relationship between cellular response and behavioral*  
576 *variability in bacterial chemotaxis*. *Proceedings of the National Academy of Sciences of*  
577 *the United States of America* (2008) **105**, 3304, doi:10.1073/pnas.0705463105
- 578 [19] Berg H. C. and Brown D. A. *Chemotaxis in Escherichia-Coli Analyzed by 3-*  
579 *Dimensional Tracking*. *Nature* (1972) **239**, 500, doi:10.1038/239500a0
- 580 [20] Dufour Y. S., Gillet S., Frankel N. W., Weibel D. B. and Emonet T. *Direct Correlation*  
581 *between Motile Behavior and Protein Abundance in Single Cells*. *Plos Computational*  
582 *Biology* (2016) **12**, doi:10.1371/journal.pcbi.1005041
- 583 [21] Spudich J. L. and Koshland D. E., Jr. *Non-genetic individuality: chance in the single*  
584 *cell*. *Nature* (1976) **262**, 467, doi:10.1038/262467a0
- 585 [22] Park H., Pontius W., Guet C. C., Marko J. F., Emonet T. and Cluzel P. *Interdependence*  
586 *of behavioural variability and response to small stimuli in bacteria*. *Nature* (2010) **468**,  
587 819, doi:10.1038/nature09551
- 588 [23] He R., Zhang R. J. and Yuan J. H. *Noise-Induced Increase of Sensitivity in Bacterial*  
589 *Chemotaxis*. *Biophysical Journal* (2016) **111**, 430, doi:10.1016/j.bpj.2016.06.013

- 590 [24] Viswanathan G. M., Buldyrev S. V., Havlin S., da Luz M. G. E., Raposo E. P. and  
591 Stanley H. E. *Optimizing the success of random searches*. Nature (1999) **401**, 911,  
592 doi:10.1038/44831
- 593 [25] Matthaus F., Jagodic M. and Dobnikar J. *E. coli Superdiffusion and Chemotaxis-Search*  
594 *Strategy, Precision, and Motility*. Biophysical Journal (2009) **97**, 946,  
595 doi:10.1016/j.bpj.2009.04.065
- 596 [26] Benichou O., Loverdo C., Moreau M. and Voituriez R. *Intermittent search strategies*.  
597 Reviews of Modern Physics (2011) **83**, doi:10.1103/RevModPhys.83.81
- 598 [27] Matthaus F., Mommer M. S., Curk T. and Dobnikar J. *On the Origin and Characteristics*  
599 *of Noise-Induced Levy Walks of E. Coli*. Plos One (2011) **6**, e18623,  
600 doi:10.1371/journal.pone.0018623
- 601 [28] Flores M., Shimizu T. S., ten Wolde P. R. and Tostevin F. *Signaling Noise Enhances*  
602 *Chemotactic Drift of E. coli*. Physical Review Letters (2012) **109**, 148101,  
603 doi:10.1103/PhysRevLett.109.148101
- 604 [29] Tu Y. and Grinstein G. *How white noise generates power-law switching in bacterial*  
605 *flagellar motors*. Physical review letters (2005) **94**, 208101,  
606 doi:10.1103/PhysRevLett.94.208101
- 607 [30] Pontius W., Sneddon M. W. and Emonet T. *Adaptation Dynamics in Densely Clustered*  
608 *Chemoreceptors*. Plos Computational Biology (2013) **9**, e1003230,  
609 doi:10.1371/journal.pcbi.1003230
- 610 [31] Springer M. S., Goy M. F. and Adler J. *Protein Methylation in Behavioral-Control*  
611 *Mechanisms and in Signal Transduction*. Nature (1979) **280**, 279, doi:10.1038/280279a0
- 612 [32] Goy M. F., Springer M. S. and Adler J. *Sensory Transduction in Escherichia-Coli - Role*  
613 *of a Protein Methylation Reaction in Sensory Adaptation*. Proceedings of the National  
614 Academy of Sciences of the United States of America (1977) **74**, 4964,  
615 doi:10.1073/pnas.74.11.4964
- 616 [33] Terwilliger T. C. and Koshland D. E. *Sites of Methyl Esterification and Deamination on*  
617 *the Aspartate Receptor Involved in Chemotaxis*. Journal of Biological Chemistry (1984)  
618 **259**, 7719,

- 619 [34] Kehry M. R. and Dahlquist F. W. *The Methyl-Accepting Chemotaxis Proteins of*  
620 *Escherichia-Coli - Identification of the Multiple Methylation Sites on Methyl-Accepting*  
621 *Chemotaxis Protein-I*. Journal of Biological Chemistry (1982) **257**, 378,
- 622 [35] Rice M. S. and Dahlquist F. W. *Sites of Deamidation and Methylation in Tsr, a Bacterial*  
623 *Chemotaxis Sensory Transducer*. Journal of Biological Chemistry (1991) **266**, 9746,
- 624 [36] Kehry M. R., Bond M. W., Hunkapiller M. W. and Dahlquist F. W. *Enzymatic*  
625 *Deamidation of Methyl-Accepting Chemotaxis Proteins in Escherichia-Coli Catalyzed by*  
626 *the Cheb Gene-Product*. Proceedings of the National Academy of Sciences of the United  
627 States of America (1983) **80**, 3599, doi:10.1073/pnas.80.12.3599
- 628 [37] Sourjik V. and Wingreen N. S. *Responding to chemical gradients: bacterial chemotaxis*.  
629 *Current Opinion in Cell Biology* (2012) **24**, 262, doi:10.1016/j.ceb.2011.11.008
- 630 [38] Hansen C. H., Endres R. G. and Wingreen N. S. *Chemotaxis in Escherichia coli: A*  
631 *Molecular Model for Robust Precise Adaptation*. PLoS Computational Biology (2008) **4**,  
632 e1, doi:10.1371/journal.pcbi.0040001
- 633 [39] Tu Y., Shimizu T. S. and Berg H. C. *Modeling the chemotactic response of Escherichia*  
634 *coli to time-varying stimuli*. Proceedings of the National Academy of Sciences of the  
635 United States of America (2008) **105**, 14855, doi:10.1073/pnas.0807569105
- 636 [40] Yi T. M., Huang Y., Simon M. I. and Doyle J. *Robust perfect adaptation in bacterial*  
637 *chemotaxis through integral feedback control*. Proceedings of the National Academy of  
638 Sciences of the United States of America (2000) **97**, 4649, doi:10.1073/pnas.97.9.4649
- 639 [41] Cluzel P., Surette M. and Leibler S. *An ultrasensitive bacterial motor revealed by*  
640 *monitoring signaling proteins in single cells*. Science (2000) **287**, 1652,  
641 doi:10.1126/science.287.5458.1652
- 642 [42] Li M. S. and Hazelbauer G. L. *Cellular stoichiometry of the components of the*  
643 *chemotaxis signaling complex*. Journal of Bacteriology (2004) **186**, 3687,  
644 doi:10.1128/Jb.186.12.3687-3694.2004
- 645 [43] Li M. S. and Hazelbauer G. L. *Adaptational assistance in clusters of bacterial*  
646 *chemoreceptors*. Molecular Microbiology (2005) **56**, 1617, doi:10.1111/j.1365-  
647 2958.2005.04641.x
- 648 [44] Schulmeister S., Ruttorf M., Thiem S., Kentner D., Lebedz D. and Sourjik V. *Protein*  
649 *exchange dynamics at chemoreceptor clusters in Escherichia coli*. Proceedings of the

- 650 National Academy of Sciences of the United States of America (2008) **105**, 6403,  
651 doi:10.1073/pnas.071061110
- 652 [45] Taute K. M., Gude S., Tans S. J. and Shimizu T. S. *High-throughput 3D tracking of*  
653 *bacteria on a standard phase contrast microscope*. Nature Communication (2015) **6**,  
654 8776, doi:10.1038/ncomms9776
- 655 [46] Tu Y. *Quantitative modeling of bacterial chemotaxis: signal amplification and accurate*  
656 *adaptation*. Annual Review of Biophysics (2013) **42**, 337, doi:10.1146/annurev-biophys-  
657 083012-130358
- 658 [47] Pinas G. E., Frank V., Vaknin A. and Parkinson J. S. *The source of high signal*  
659 *cooperativity in bacterial chemosensory arrays*. Proceedings of the National Academy of  
660 Sciences of the United States of America (2016) **113**, 3335,  
661 doi:10.1073/pnas.1600216113
- 662 [48] Mello B. A. and Tu Y. *Quantitative modeling of sensitivity in bacterial chemotaxis: the*  
663 *role of coupling among different chemoreceptor species*. Proceedings of the National  
664 Academy of Sciences of the United States of America (2003) **100**, 8223,  
665 doi:10.1073/pnas.1330839100
- 666 [49] Monod J., Wyman J. and Changeux J. P. *On Nature of Allosteric Transitions - a*  
667 *Plausible Model*. Journal of Molecular Biology (1965) **12**, 88, doi:10.1016/S0022-  
668 2836(65)80285-6
- 669 [50] Keymer J. E., Endres R. G., Skoge M., Meir Y. and Wingreen N. S. *Chemosensing in*  
670 *Escherichia coli: Two regimes of two-state receptors*. Proceedings of the National  
671 Academy of Sciences of the United States of America (2006) **103**, 1786,  
672 doi:10.1073/pnas.0507438103
- 673 [51] Duke T. A. J. and Bray D. *Heightened sensitivity of a lattice of membrane receptors*.  
674 Proceedings of the National Academy of Sciences of the United States of America (1999)  
675 **96**, 10104, doi:10.1073/pnas.96.18.10104
- 676 [52] Frank V. and Vaknin A. *Prolonged stimuli alter the bacterial chemosensory clusters*.  
677 Molecular Microbiology (2013) **88**, 634, doi:10.1111/mmi.12215
- 678 [53] Sourjik V. and Berg H. C. *Receptor sensitivity in bacterial chemotaxis*. Proceedings of  
679 the National Academy of Sciences of the United States of America (2002) **99**, 123,  
680 doi:10.1073/pnas.011589998



- 681 [54] Sourjik V., Vaknin A., Shimizu T. S. and Berg H. C. *In vivo measurement by FRET of*  
682 *pathway activity in bacterial chemotaxis*. *Two-Component Signaling Systems, Pt B*  
683 (2007) **423**, 365, doi:10.1016/S0076-6879(07)23017-4
- 684 [55] Meir Y., Jakovljevic V., Oleksiuk O., Sourjik V. and Wingreen N. S. *Precision and*  
685 *Kinetics of Adaptation in Bacterial Chemotaxis*. *Biophysical Journal* (2010) **99**, 2766,  
686 doi:10.1016/j.bpj.2010.08.051
- 687 [56] Neumann S., Vladimirov N., Krembel A. K., Wingreen N. S. and Sourjik V. *Imprecision*  
688 *of Adaptation in Escherichia coli Chemotaxis*. *PLoS ONE* (2014) **9**, e84904,  
689 doi:10.1371/journal.pone.0084904
- 690 [57] Krembel A. K., Neumann S. and Sourjik V. *Universal response-adaptation relation in*  
691 *bacterial chemotaxis*. *Journal of Bacteriology* (2014) **JB.02171**, doi:10.1128/JB.02171-  
692 14
- 693 [58] Berg H. C. and Tedesco P. M. *Transient-Response to Chemotactic Stimuli in*  
694 *Escherichia-Coli*. *Proceedings of the National Academy of Sciences of the United States*  
695 *of America* (1975) **72**, 3235, doi:10.1073/pnas.72.8.3235
- 696 [59] Endres R. G., Oleksiuk O., Hansen C. H., Meir Y., Sourjik V. and Wingreen N. S.  
697 *Variable sizes of Escherichia coli chemoreceptor signaling teams*. *Molecular Systems*  
698 *Biology* (2008) **4**, 211, doi:10.1038/Msb.2008.49
- 699 [60] Oleksiuk O., Jakovljevic V., Vladimirov N., Carvalho R., Paster E., Ryu W. S., Meir Y.,  
700 Wingreen N. S., Kollmann M. and Sourjik V. *Thermal robustness of signaling in*  
701 *bacterial chemotaxis*. *Cell* (2011) **145**, 312, doi:10.1016/j.cell.2011.03.013
- 702 [61] Frank V., Pinas G. E., Cohen H., Parkinson J. S. and Vaknin A. *Networked*  
703 *Chemoreceptors Benefit Bacterial Chemotaxis Performance*. *MBio* (2016) **7**,  
704 doi:10.1128/mBio.01824-16
- 705 [62] Kubo R. *Fluctuation-Dissipation Theorem*. *Reports on Progress in Physics* (1966) **29**,  
706 255, doi:10.1088/0034-4885/29/1/306
- 707 [63] Robert D., Nguyen T. H., Gallet F. and Wilhelm C. *In Vivo Determination of Fluctuating*  
708 *Forces during Endosome Trafficking Using a Combination of Active and Passive*  
709 *Microrheology*. *Plos One* (2010) **5**, e10046, doi:10.1371/journal.pone.0010046
- 710 [64] Martin P., Hudspeth A. J. and Julicher F. *Comparison of a hair bundle's spontaneous*  
711 *oscillations with its response to mechanical stimulation reveals the underlying active*



- 712 *process*. Proceedings of the National Academy of Sciences of the United States of  
713 America (2001) **98**, 14380, doi:DOI 10.1073/pnas.251530598
- 714 [65] Mizuno D., Tardin C., Schmidt C. F. and MacKintosh F. C. *Nonequilibrium mechanics*  
715 *of active cytoskeletal networks*. Science (2007) **315**, 370, doi:10.1126/science.1134404
- 716 [66] Cugliandolo L. F. *The effective temperature*. Journal of Physics a-Mathematical and  
717 Theoretical (2011) **44**, doi:10.1088/1751-8113/44/48/483001
- 718 [67] Hansen C. H., Sourjik V. and Wingreen N. S. *A dynamic-signaling-team model for*  
719 *chemotaxis receptors in Escherichia coli*. Proceedings of the National Academy of  
720 Sciences of the United States of America (2010) **107**, 17170,  
721 doi:10.1073/pnas.1005017107
- 722 [68] Shimizu T. S., Aksenov S. V. and Bray D. *A spatially extended stochastic model of the*  
723 *bacterial chemotaxis signalling pathway*. Journal of Molecular Biology (2003) **329**, 291,  
724 doi:10.1016/S0022-2836(03)00437-6
- 725 [69] Clausznitzer D., Oleksiuk O., Løvdok L., Sourjik V. and Endres R. G. *Chemotactic*  
726 *Response and Adaptation Dynamics in Escherichia coli*. PLoS Computational Biology  
727 (2010) **6**, e1000784, doi:10.1371/journal.pcbi.1000784
- 728 [70] Neumann S., Lovdok L., Bentele K., Meisig J., Ullner E., Paldy F. S., Sourjik V. and  
729 Kollmann M. *Exponential Signaling Gain at the Receptor Level Enhances Signal-to-*  
730 *Noise Ratio in Bacterial Chemotaxis*. Plos One (2014) **9**,  
731 doi:10.1371/journal.pone.0087815
- 732 [71] Mello B. A. and Tu Y. *Effects of adaptation in maintaining high sensitivity over a wide*  
733 *range of backgrounds for Escherichia coli chemotaxis*. Biophysical journal (2007) **92**,  
734 2329, doi:10.1529/biophysj.106.097808
- 735 [72] Lan G., Sartori P., Neumann S., Sourjik V. and Tu Y. H. *The energy-speed-accuracy*  
736 *trade-off in sensory adaptation*. Nature Physics (2012) **8**, 422, doi:10.1038/Nphys2276
- 737 [73] Sartori P. and Tu Y. *Noise filtering strategies in adaptive biochemical signaling*  
738 *networks: Application to E. coli chemotaxis*. Journal of statistical physics (2011) **142**,  
739 1206, doi:10.1007/s10955-011-0169-z
- 740 [74] Sartori P. and Tu Y. H. *Free Energy Cost of Reducing Noise while Maintaining a High*  
741 *Sensitivity*. Physical Review Letters (2015) **115**, doi:10.1103/PhysRevLett.115.118102

- 742 [75] Sourjik V. and Berg H. C. *Functional interactions between receptors in bacterial*  
743 *chemotaxis*. Nature (2004) **428**, 437, doi:10.1038/nature02406
- 744 [76] Li G. Y. and Weis R. M. *Covalent modification regulates ligand binding to receptor*  
745 *complexes in the chemosensory system of Escherichia coli*. Cell (2000) **100**, 357,  
746 doi:10.1016/S0092-8674(00)80671-6
- 747 [77] Aquino G., Clausnitzer D., Tollis S. and Endres R. G. *Optimal receptor-cluster size*  
748 *determined by intrinsic and extrinsic noise*. Physical Review E (2011) **83**, 021914,  
749 doi:10.1103/Physreve.83.021914
- 750 [78] Li M. S. and Hazelbauer G. L. *Selective allosteric coupling in core chemotaxis signaling*  
751 *complexes*. Proceedings of the National Academy of Sciences of the United States of  
752 America (2014) **111**, 15940, doi:10.1073/pnas.1415184111
- 753 [79] Chevry L., Colin R., Abou B. and Berret J. F. *Intracellular micro-rheology probed by*  
754 *micron-sized wires*. Biomaterials (2013) **34**, 6299,  
755 doi:10.1016/j.biomaterials.2013.05.002
- 756 [80] Skoge M. L., Endres R. G. and Wingreen N. S. *Receptor-receptor coupling in bacterial*  
757 *chemotaxis: Evidence for strongly coupled clusters*. Biophysical Journal (2006) **90**,  
758 4317, doi:10.1529/biophysj.105.079905
- 759 [81] Neumann S., Grosse K. and Sourjik V. *Chemotactic signaling via carbohydrate*  
760 *phosphotransferase systems in Escherichia coli*. Proceedings of the National Academy  
761 of Sciences of the United States of America (2012) **109**, 12159,  
762 doi:10.1073/pnas.1205307109
- 763 [82] Krembel A., Colin R. and Sourjik V. *Importance of Multiple Methylation Sites in*  
764 *Escherichia coli Chemotaxis*. PLoS One (2015) **10**, e0145582,  
765 doi:10.1371/journal.pone.0145582

766

767

768

769

770

771

772 **Supplementary Figures**

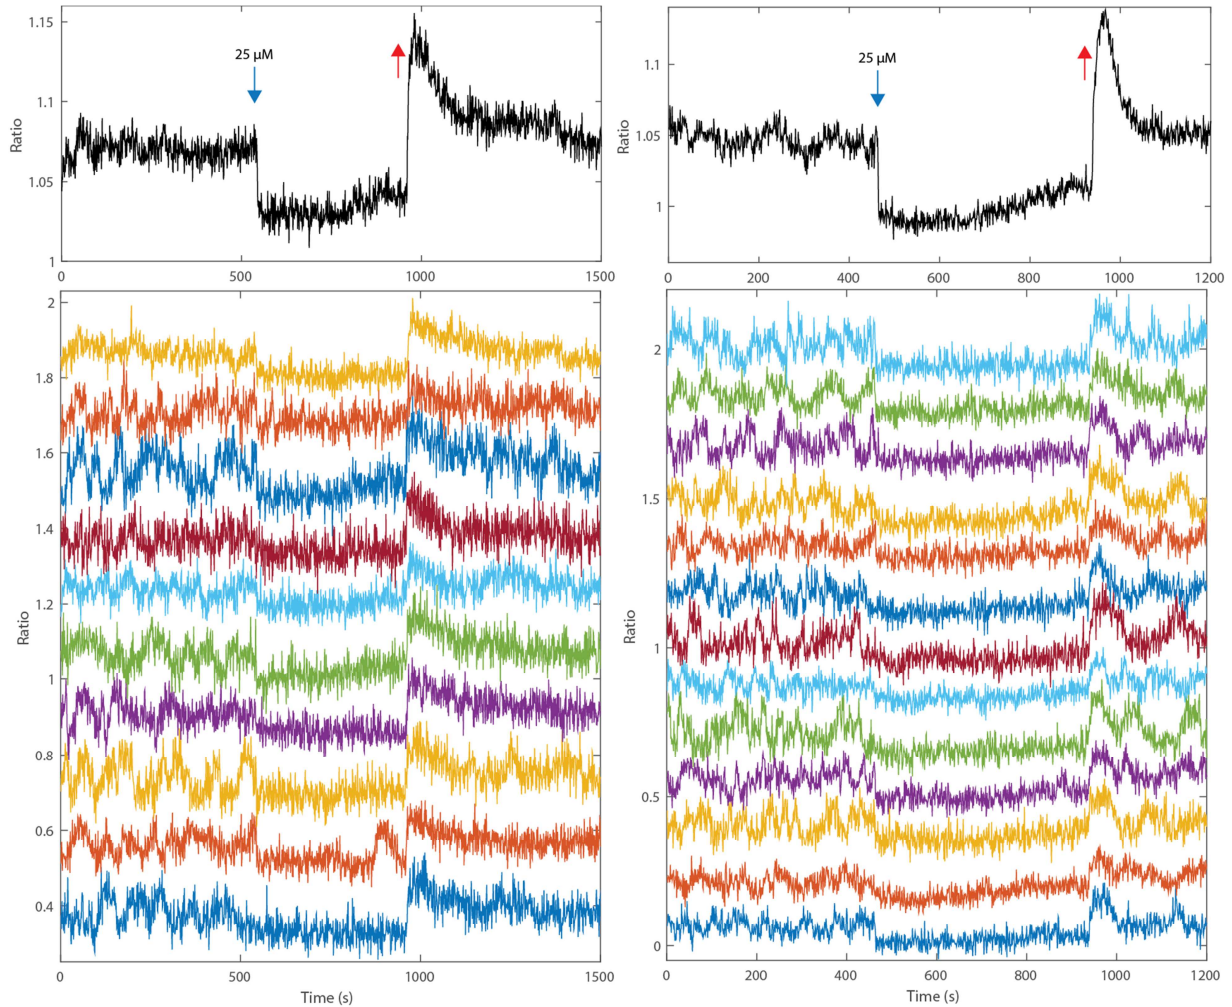

773

774 **Figure 1 – Figure Supplement 1. Additional typical FRET ratios in adapting strain.**

775 Population averaged ratio (top) and corresponding single cell ratios (bottom), in two typical

776 experiments, with adaptation proficient strain expressing Tar<sup>QEQE</sup> as the sole receptor. Blue

777 arrows indicate stimulation with 25  $\mu$ M MeAsp, and red ones return to buffer condition. Ratios

778 have been shifted to facilitate visualization.

779

780

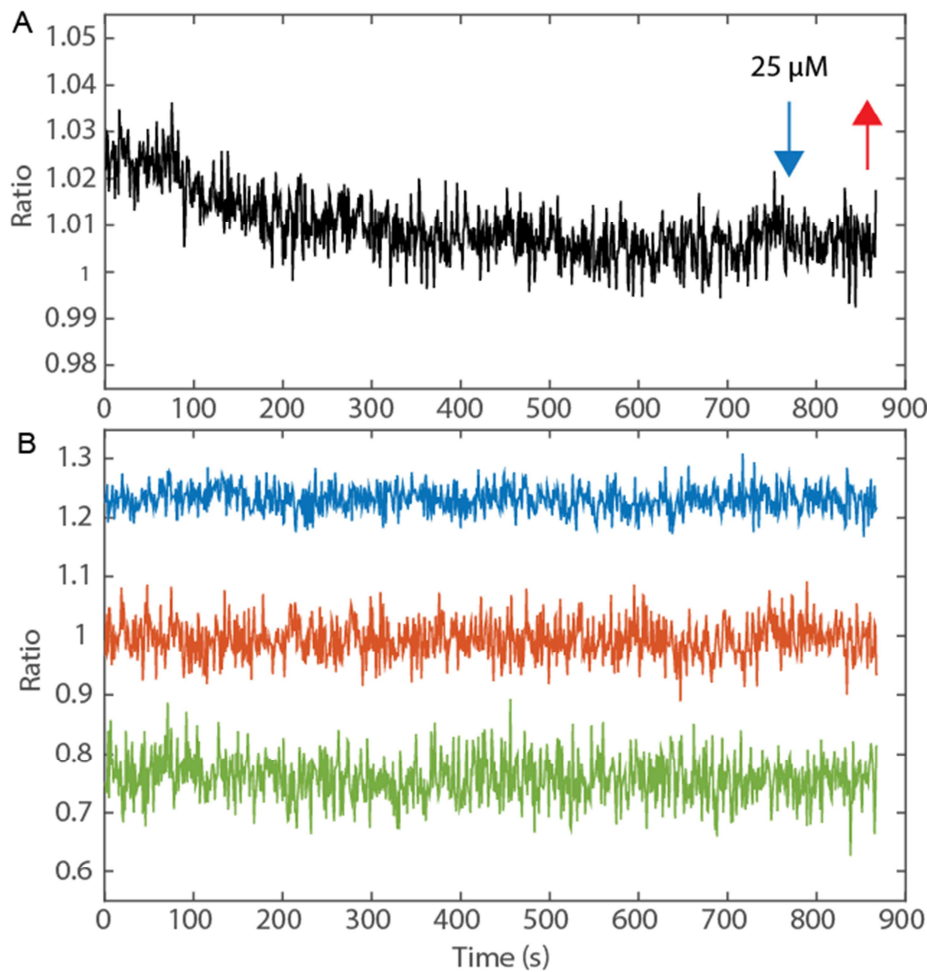

781

782 **Figure 1 – Figure Supplement 2. FRET ratios in the receptorless strain.** (A) Population  
783 averaged ratio is mostly constant and exhibit no change in kinase activity upon stimulation with  
784 25  $\mu\text{M}$  MeAsp (arrow). (B) The single cell ratios were unresponsive and non-fluctuating. Only  
785 shot noise, in a similar strength to the Tar positive strains, was observed.

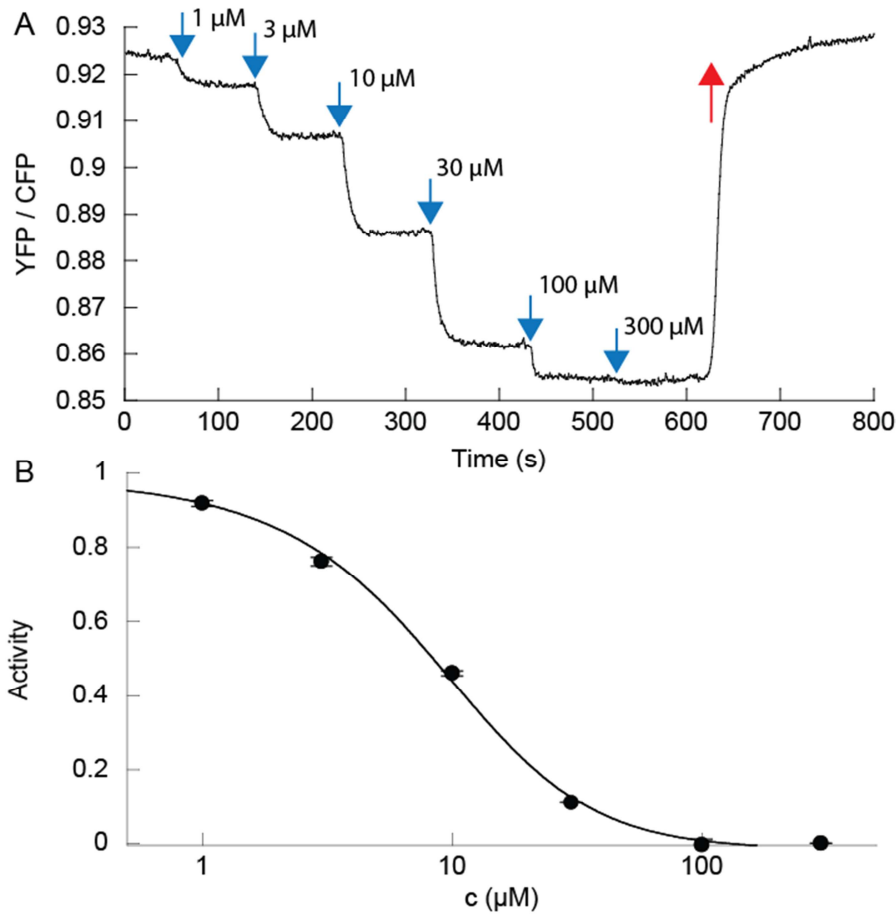

786

787 **Figure 3 – Figure Supplement 1. Dose response to MeAsp of strain  $\Delta cheRcheB$  CheW-X2**

788 **expressing Tar<sup>QEQE</sup>.** (A) Example of the YFP/CFP ratio ( $R$ ) decreasing as increasing amounts of

789 MeAsp were delivered to the cells. (B) The activity averaged over two biological replicates was

790 estimated as  $(R(c) - R_{\min}) / (R_{\max} - R_{\min})$ , plotted as a function of MeAsp concentration  $c$ , and

791 fitted using the Monod-Wyman-Changeux model, assuming a free energy difference in absence

792 of ligand  $\gamma(m = 2) = -1$ , yielding a cooperativity number  $N = 1.73$  and an inactive binding

793 constant  $K_{\text{OFF}} = 3.92 \mu\text{M}$ . Fitting with a Hill function yields a Hill exponent  $H = 1.4$  and a

794 concentration of half response  $EC_{50} = 8.3 \mu\text{M}$ . Error bars indicate SEM. Measurements were

795 carried out on confluent populations of cells.

796

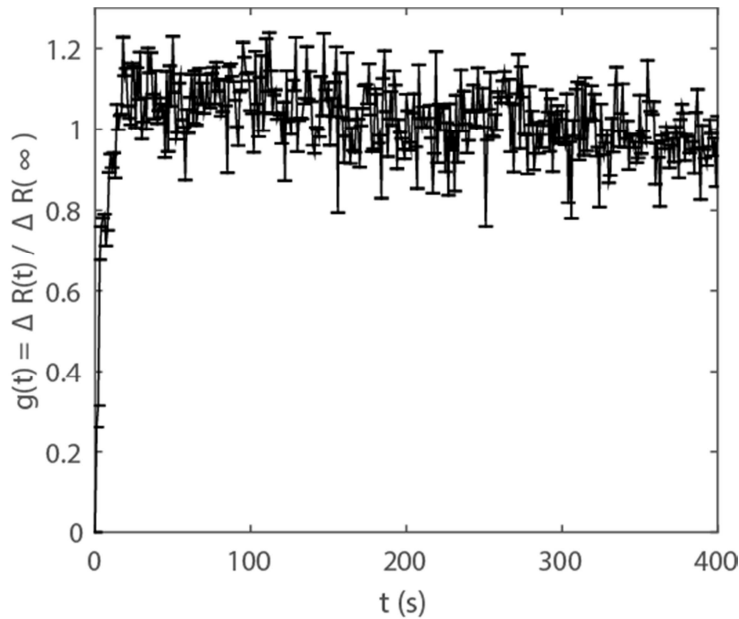

797

798 **Figure 3 – Figure Supplement 2. Response function for the strain  $\Delta cheRcheB$  CheW-X2**

799 **expressing Tar<sup>QEQE</sup> as sole receptor.** The strain was subjected to an increase of 10  $\mu$ M MeAsp

800 to measure the response. The long term dynamics observed in WT CheW strain is absent, the

801 response being almost immediate (response time  $4.5 \pm 0.5$  s, similar to the time necessary to

802 achieve homogeneous concentration in the field of view). Error bars indicate SEM and sample

803 size is 120 single cells, in 3 biological replicates.

804



805

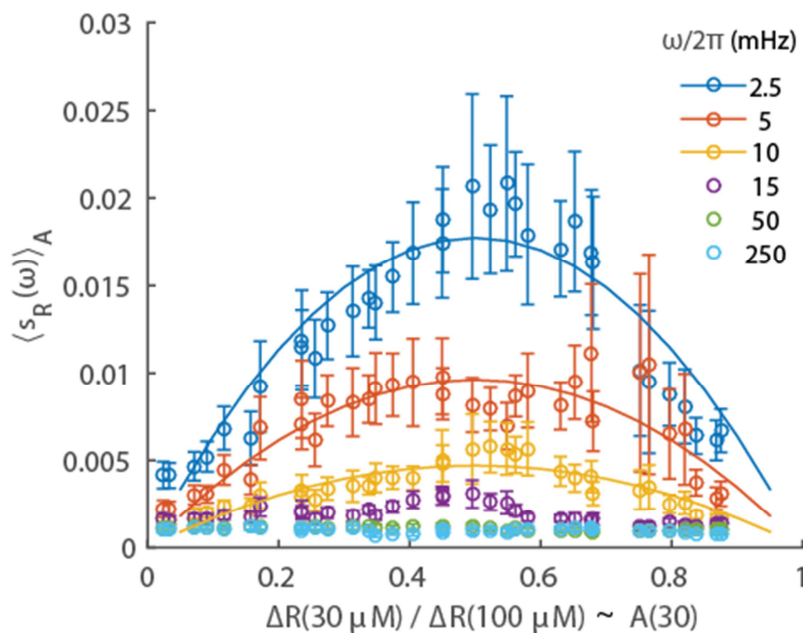

806

807 **Figure 4 – Figure Supplement 1. Power spectral density computed on subsets of the cell**  
 808 **populations sorted according to their activity**, as a function of the average activity of the  
 809 subsets, for the indicated frequencies (dots) in the  $\Delta cheRcheB$  strain expressing  $Tar^{QE QE}$ . The  
 810 lines correspond to best adjustments by  $\langle s_R(\omega) \rangle_A = C(\omega)A(30)(1 - A(30))$  for each  
 811 frequency considered. The error bars correspond to SEM, sample sizes are as described in  
 812 supplementary methods, varying from 54 to 135 cells depending on the point, taken from at least  
 813 5 biological replicates.

814

815

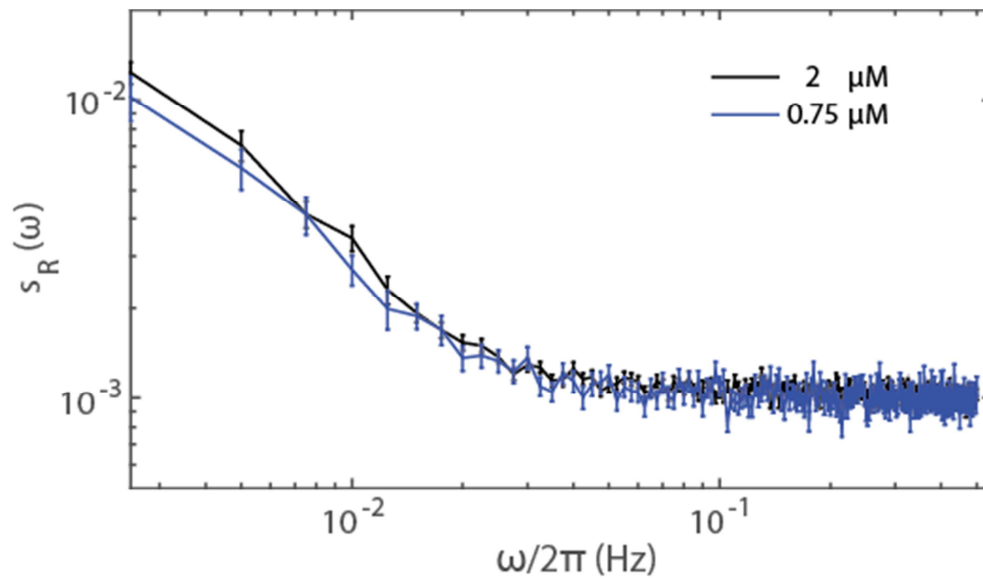

816

817 **Figure 4 – Figure Supplement 2. Effect of the receptor expression level on the noise in non-**

818 **adaptive strains.** The  $\Delta cheR cheB$  strain expressing  $\text{Tar}^{\text{QEQE}}$  as the sole receptor, from a plasmid

819 under salicylate induction, was exposed to either  $0.75 \mu\text{M}$  or  $2 \mu\text{M}$  (standard experimental

820 condition in the main text) salicylate, resulting in a factor of two between the protein numbers in

821 the cell [59]. The power spectral density under  $30 \mu\text{M}$  MeAsp, with average activity  $A = 0.5$ , was

822 the same in both conditions. Error bars indicate SEM and sample sizes are 540 ( $2 \mu\text{M}$ ) or 187

823 ( $0.75 \mu\text{M}$ ) cells.

824

825

826



827 **Supplementary Tables**

828 Table S1. Strain list

| Strain | Genotype                                                                                                                                              | Background | Ref. |
|--------|-------------------------------------------------------------------------------------------------------------------------------------------------------|------------|------|
| VS181  | $\Delta(\text{tar},\text{tsr},\text{trg},\text{tap},\text{aer}) \Delta(\text{cheY},\text{cheZ})$                                                      | RP437      | [75] |
| VH1    | $\Delta(\text{tar},\text{tsr},\text{trg},\text{tap},\text{aer}) \Delta(\text{cheY},\text{cheZ}) \Delta(\text{cheR},\text{cheB})$                      | RP437      | [59] |
| VF7    | $\Delta(\text{tar},\text{tsr},\text{trg},\text{tap},\text{aer}) \Delta(\text{cheY},\text{cheZ}) \Delta(\text{cheR},\text{cheB})$<br>cheW(R117D,F122S) | RP437      | [61] |
| VF8    | $\Delta(\text{tar},\text{tsr},\text{trg},\text{tap},\text{aer}) \Delta(\text{cheY},\text{cheZ}) \text{cheW(R117D,F122S)}$                             | RP437      | [61] |

829

830 Table S2. Plasmid list

| Plasmid | Genotype                                   | Antibiotic                       | Induction                                        | Ref. |
|---------|--------------------------------------------|----------------------------------|--------------------------------------------------|------|
| pVS88   | cheY-YFP/cheZ-CFP,<br>pTRC99a derivative   | Ampicillin<br>100 $\mu$ g/ml     | IPTG 200 $\mu$ M,                                | [75] |
| pVS1092 | Tar <sup>QEQE</sup> ,<br>pKG110 derivative | Chloramphenicol<br>17 $\mu$ g/ml | Salicylate 2 $\mu$ M,<br>If not otherwise stated | [75] |
| pVS1087 | Tar <sup>QEEE</sup> ,<br>pKG110 derivative | Chloramphenicol<br>17 $\mu$ g/ml | Salicylate 2 $\mu$ M,<br>If not otherwise stated | [81] |
| pVS1086 | Tar <sup>EEEE</sup> ,<br>pKG110 derivative | Chloramphenicol<br>17 $\mu$ g/ml | Salicylate 2 $\mu$ M,<br>If not otherwise stated | [82] |

831
